# Supplementary material
Source: PubMed Central journal article supplement (PMC6693900)
Supplement: NIHMS987386-supplement-ESI.pdf [file NIHMS987386-supplement-ESI.pdf]

## Supporting Information

### Enhanced Capture and Release of Circulating Tumor Cells Using Hollow Glass Microspheres with Nanostructured Surface

Ziye Dong,<sup>1</sup> Dan Yu,<sup>1,2</sup> Qingye Liu,<sup>1,3</sup> Zhenya Ding,<sup>1</sup> Veronica J. Lyons,<sup>4</sup> Robert K. Bright,<sup>5</sup> Dimitri Pappas,<sup>4</sup> Xinli Liu,<sup>6</sup> Wei Li<sup>1,\*</sup>

<sup>1</sup> Department of Chemical Engineering, Texas Tech University, Lubbock, TX, 79409

<sup>2</sup> Department of Critical Care Medicine, People's Hospital of Zhengzhou University (Henan Provincial People's Hospital), Zhengzhou, China, 450003

<sup>3</sup> School of Chemical Engineering and Technology, North University of China, Taiyuan, China, 030051

<sup>4</sup> Department of Chemistry and Biochemistry, Texas Tech University, Lubbock, TX, 79409

<sup>5</sup> Department of Immunology & Molecular Microbiology, School of Medicine & Graduate School of Biomedical Sciences, Texas Tech University Health Sciences Center, Lubbock, TX 79430

<sup>6</sup> Department of Pharmacological and Pharmaceutical Sciences, College of Pharmacy, University of Houston, Houston, TX, 77204

## Author Information

[\*] To whom correspondence and reprint requests should be addressed.

E-mail: wei.li@ttu.edu

### Cancer cell isolation process

Cancer cells were detached by 0.05% trypsin/EDTA and spiked in blood samples. The spiked blood and <sup>NS</sup>HGMSs were then distributed in 0.5 mL low binding Eppendorf tubes (0.1 mL per tube). After rotation on a Hula mixer, the Eppendorf tubes were flipped and allowed to stand for 5 min. All <sup>NS</sup>HGMSs floated toward to tip of Eppendorf tube and uncaptured cells sank down because of gravity. The blood cells and uncaptured cancer cells were transferred to a 96 well plate. Then the <sup>NS</sup>HGMSs were collected by pipet with low binding pipet tips to a silane-treated PDMS microwell (hydrophobic surface) where a cover slide was used to cover the top surface of liquid to evenly distribute <sup>NS</sup>HGMSs. Therefore, all <sup>NS</sup>HGMSs floated at the same height and can be counted under a microscope. Also, uncaptured cancer cells in the 96 well plate were counted under a microscope. The total number spiked cancer cells (m+n) was calculated by adding up the number of captured cancer cells from the PDMS microwell (m) and uncaptured cancer cells from the 96 well plate (n).

$$\text{Capture efficiency} = \frac{\text{Number of captured cancer cells (m)}}{\text{Total number of spiked cancer cells (m+n)}}$$

### Supplementary Figures

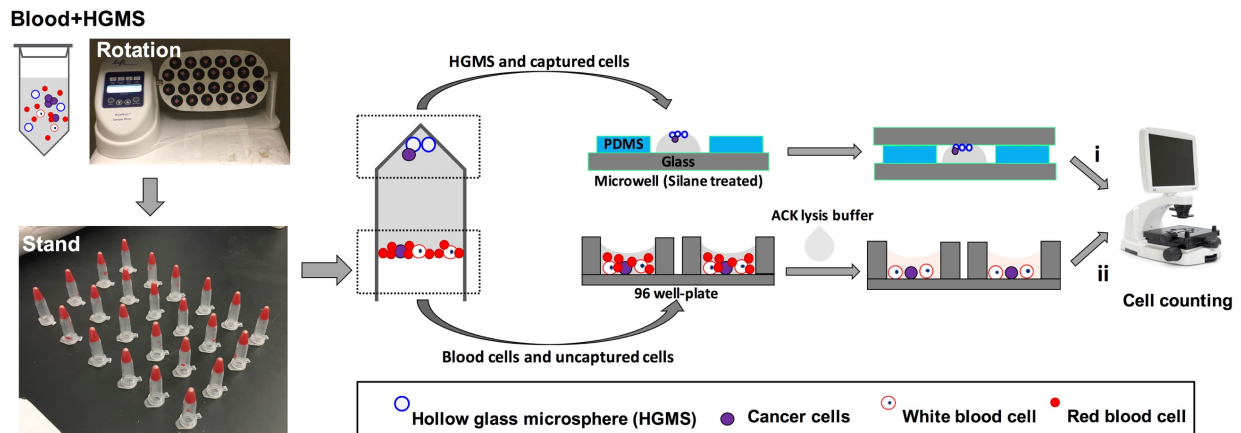

Fig. S1. Diagram of cancer cell isolation process.
